# Supplementary material
Source: PubMed Central journal article supplement (PMC5472349)

Figure 2e

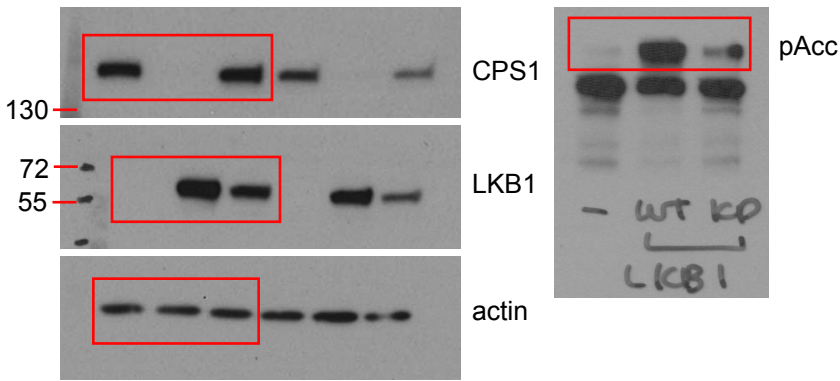

Figure 3b

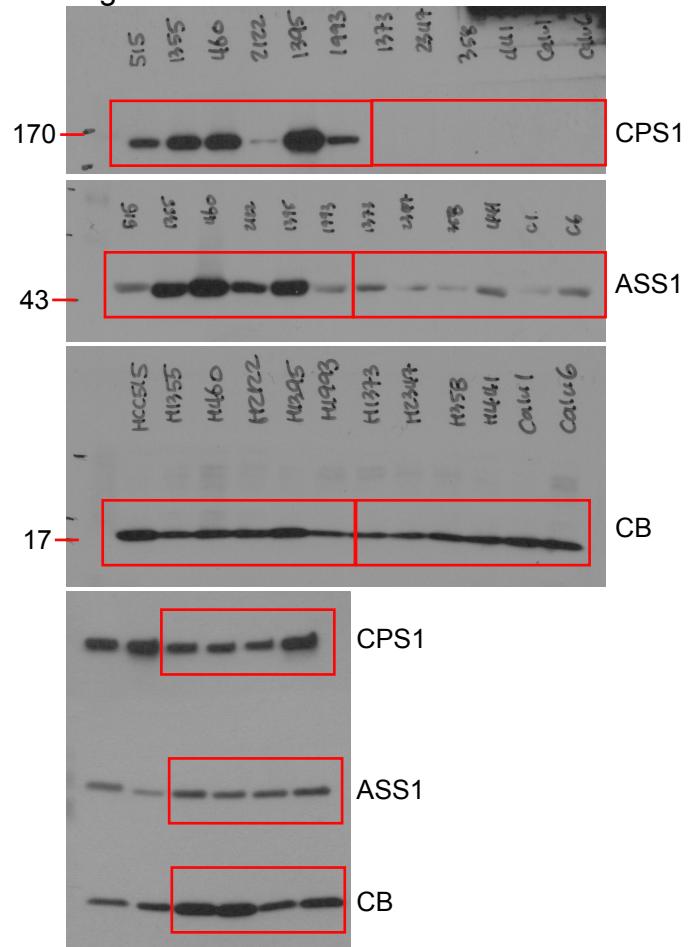

Figure 2f

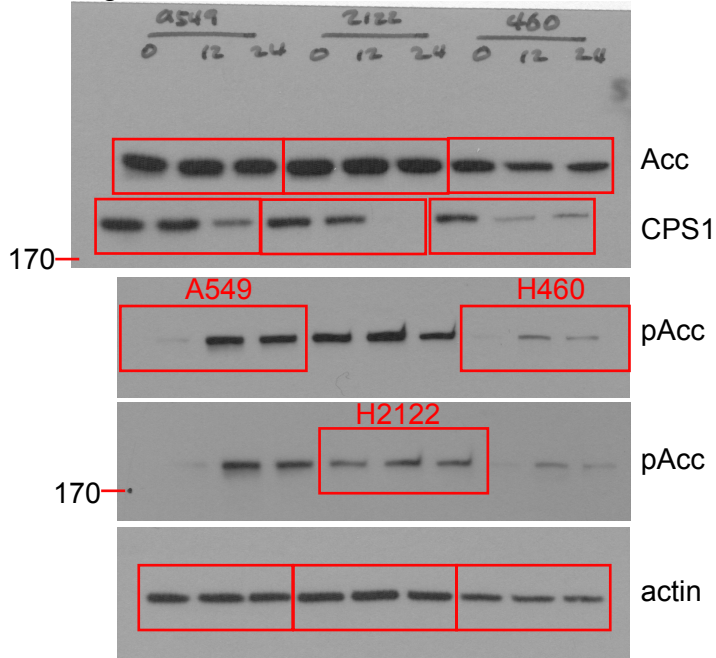

Figure 4c

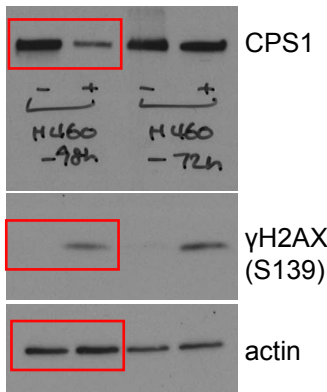

Figure 4d

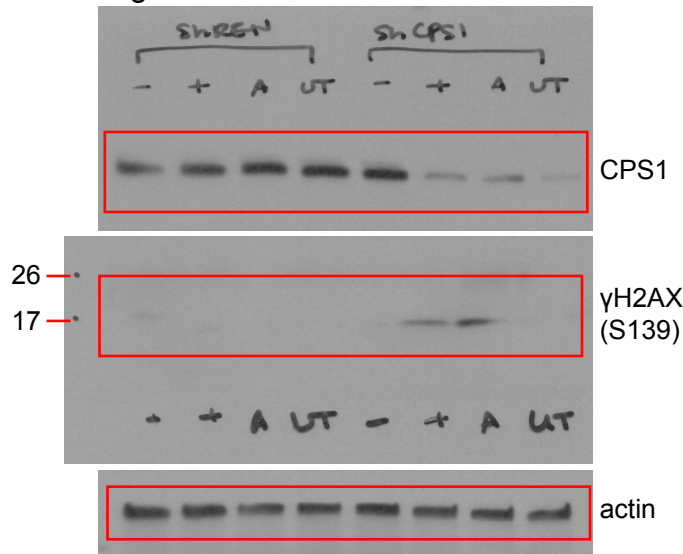

Extended Data Figure 4a

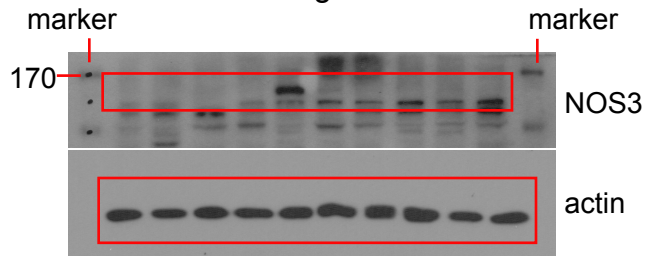

Extended Data Figure 5d-bottom

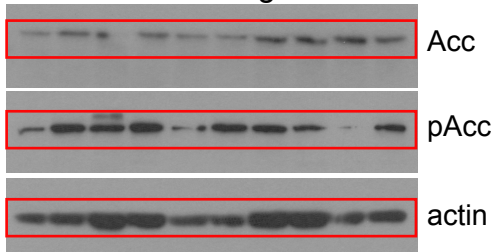

Extended Data Figure 4h

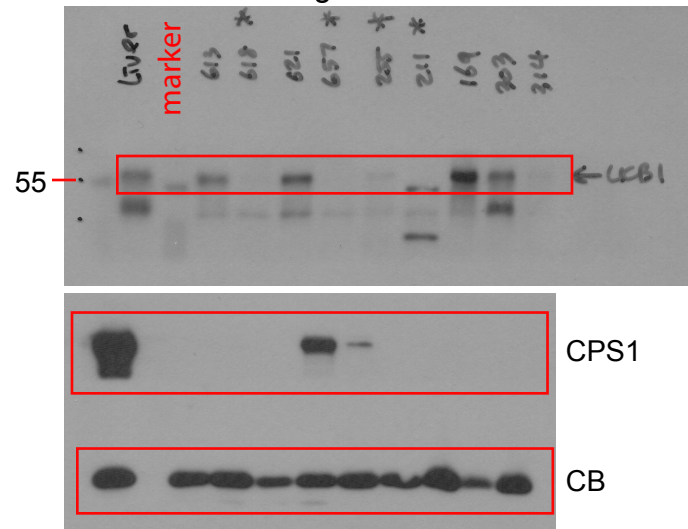

Extended Data Figure 5g

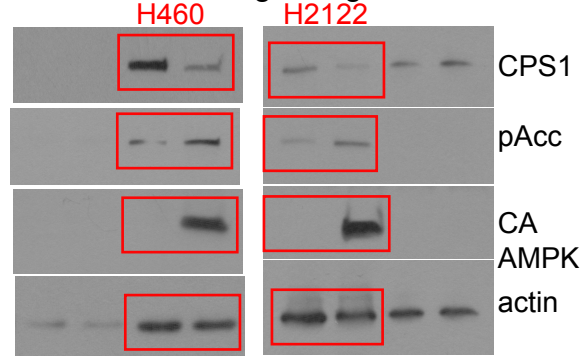

Extended Data Figure 5b

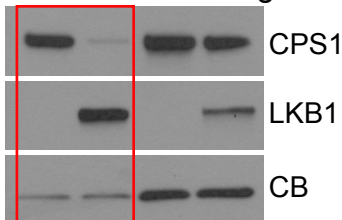

Extended Data Figure 5h

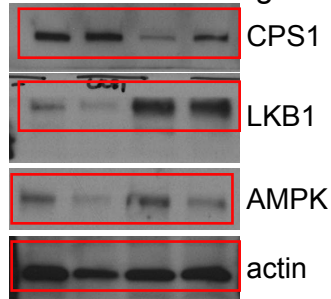

Extended Data Figure 5i

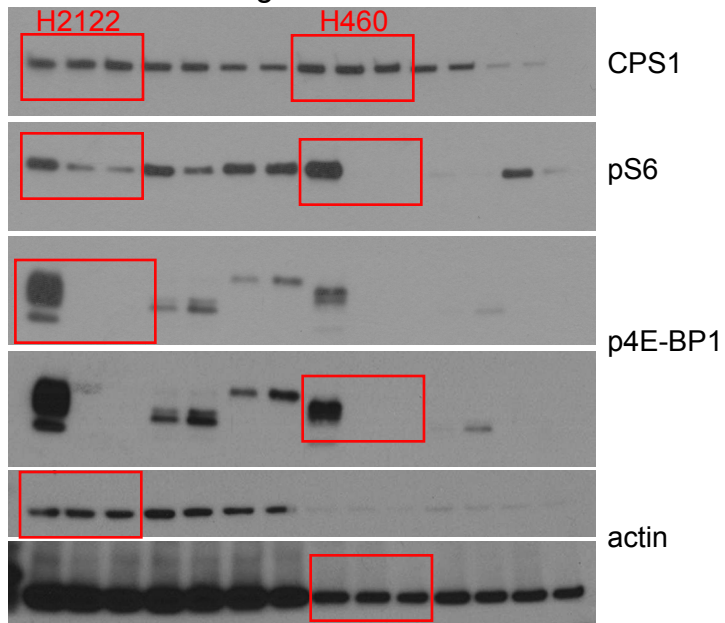

Extended Data Figure 5c

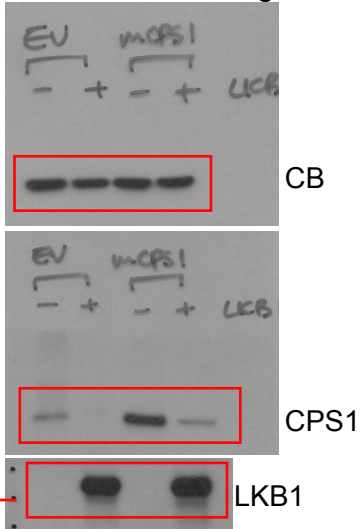

Extended Data Figure 5j

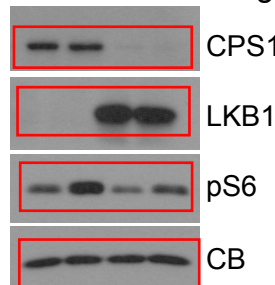

Extended Data Figure 5d-top

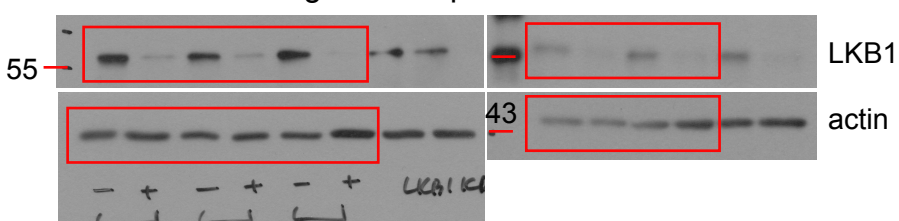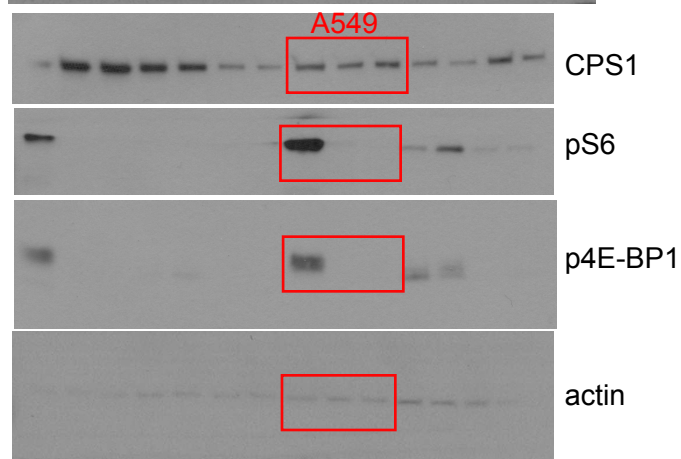

Extended Data Figure 6e

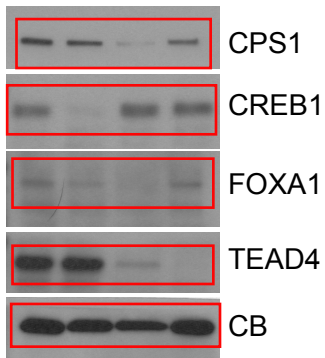

Extended Data Figure 7g

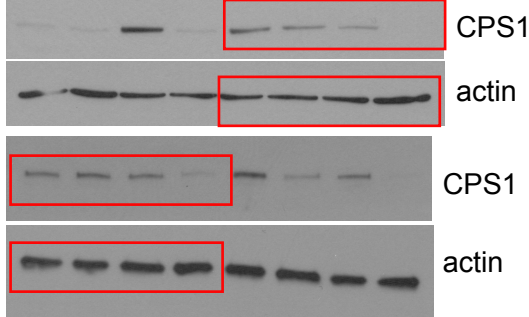

Extended Data Figure 7h

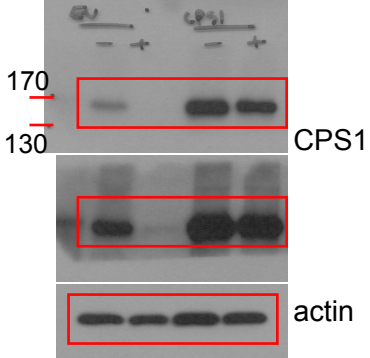

Extended Data Figure 8a

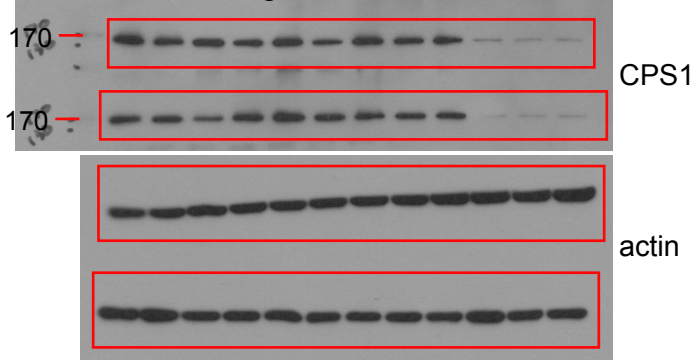

Extended Data Figure 7a

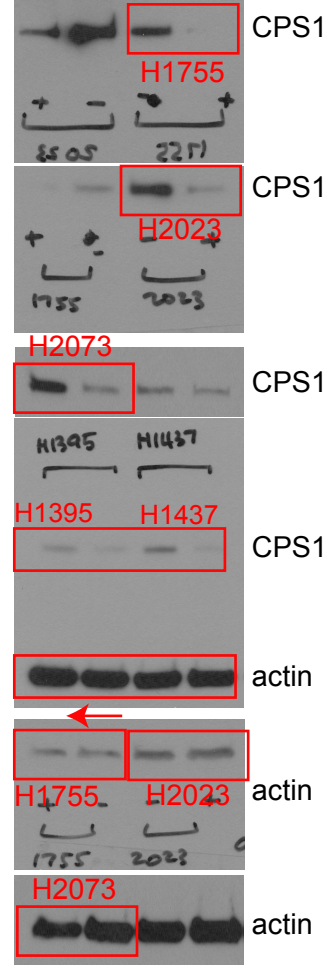

Extended Data Figure 7a

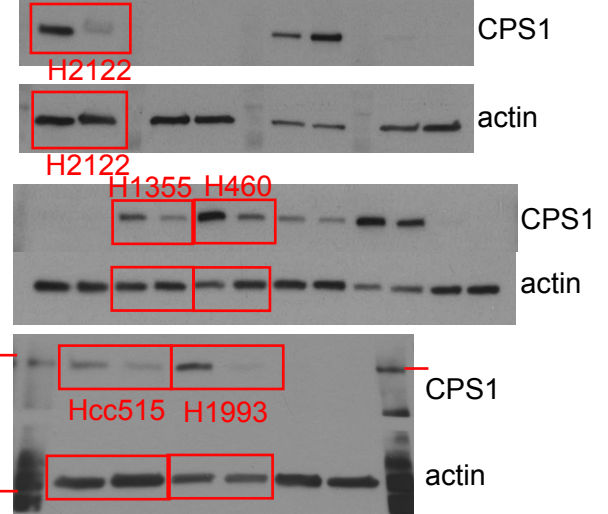

Extended Data Figure 7e

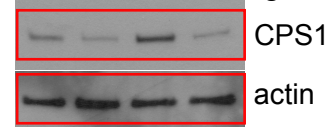

Extended Data Figure 8b

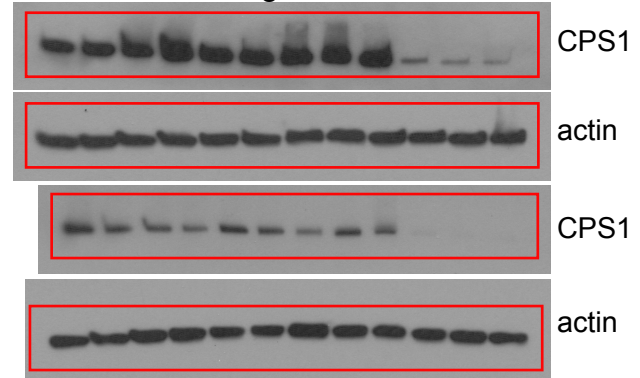

Extended Data Figure 9c

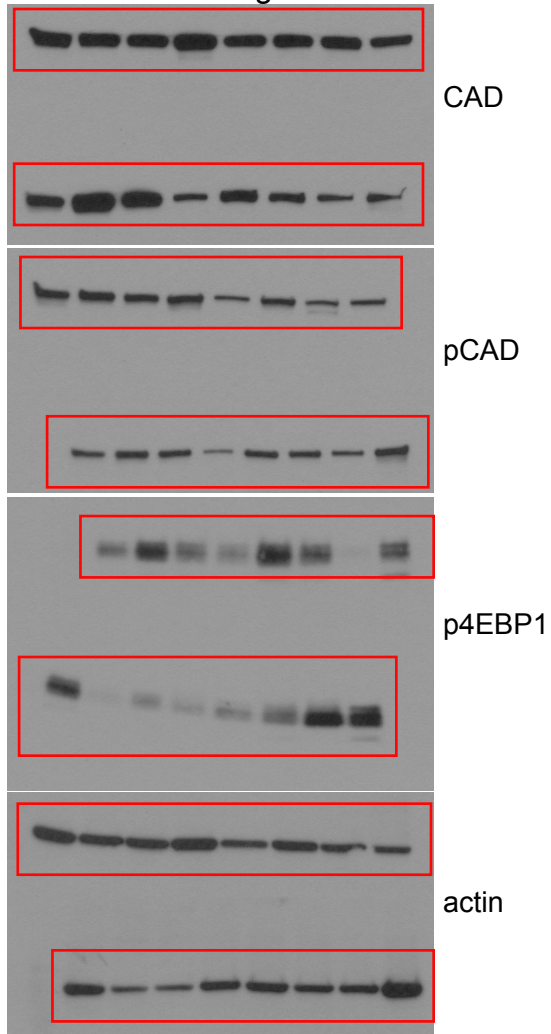

Extended Data Figure 9d, *Left*

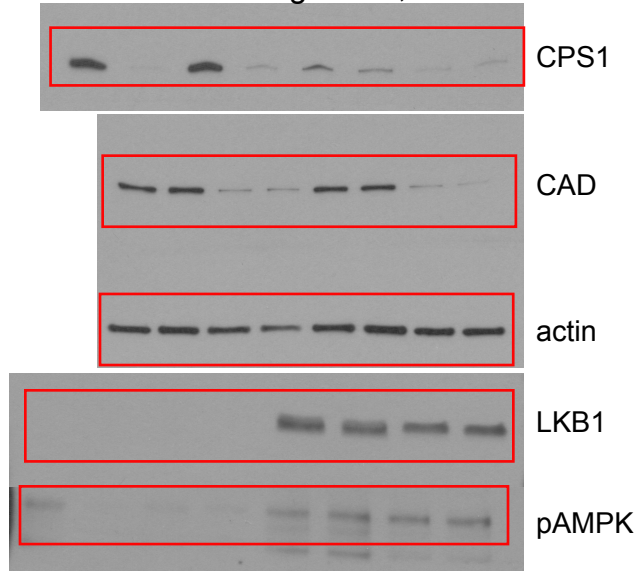

Extended Data Figure 9d, *Right*

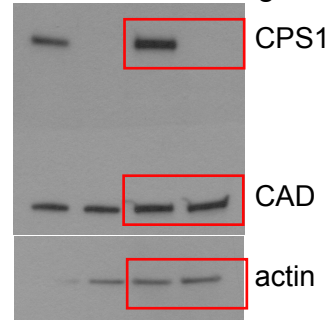

Extended Data Figure 9h

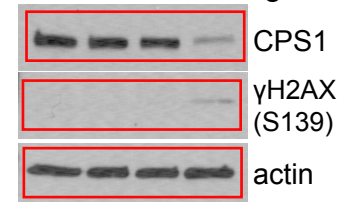

Extended Data Figure 10d

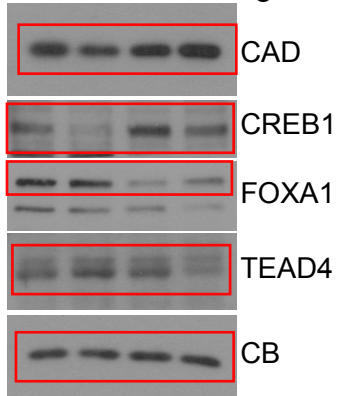

Extended Data Figure 10e

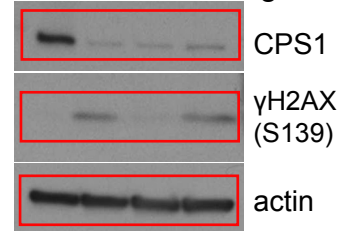

Supplement: NIHMS867391-supplement-1.pdf [file NIHMS867391-supplement-1.pdf]
